# Supplementary material
Source: MDPI journal article supplement (https://www.mdpi.com/2306-5729/6/3/28)
Supplement: s1 [file s1]

This table shows Full width at half intensity maximum (W) for Tb II, Tb III  and Tb IV 
lines broadened by collisions with electrons. Transitions and wavelengths calculated from 
energy level vaues are also given in the table. The electron density is 10+17 cm-3 
and temperatures are from 5 000 to 80 000 K. Also is  given quantity 3kT/2ΔE, where 
ΔE is the energy difference between closest perturbing level and the closer of initial 
and final levels. In order that the used method is valid, this quantity should be less or 
equal two. One value for larger from two is given for better interpolation. 

  TRANSITION                                                       T(K)   W(A)      (3kT/2ΔE)max  

  Tb II (6Ho15/2)6s1/2(15/2,1/2)o  -  (6Ho15/2)6p1/2(15/2,1/2)     5000.  0.393      0.734    
         λ=3934.1 A                                               10000.  0.278       1.47    
                                                                  20000.  0.196       2.94    
 
  Tb II  (6Ho15/2)6s1/2(15/2,1/2)o  -  (6Ho15/2)6p3/2(15/2,3/2)    5000.  0.350      0.556    
         λ=3610.5 A                                               10000.  0.247       1.11    
                                                                  20000.  0.175       2.22    
   
  Tb II (6Ho13/2)6s1/2(13/2,1/2)o  -  (6Ho13/2)6p1/2(13/2,1/2)     5000.  0.393      0.529    
         λ=3938.3 A                                               10000.  0.278       1.06    
                                                                  20000.  0.196       2.12    
   
  Tb II (6Ho13/2)6s1/2(13/2,1/2)o  -  (6Ho13/2)6p3/2(13/2,3/2)     5000.  0.344      0.417    
         λ=3567.3 A                                               10000.  0.243      0.834    
                                                                  20000.  0.172       1.67    
                                                                  40000.  0.122       3.34    
    
  Tb II (6Ho11/2)6s1/2(11/2,1/2)o  -  (6Ho11/2)6p1/2(11/2,1/2)     5000.  0.397      0.449    
         λ=3966.1 A                                               10000.  0.281      0.897    
                                                                  20000.  0.198       1.79    
                                                                  40000.  0.140       3.59    

 -----------------------------------------------------------------------------------------   
  Tb III 5d8G - 6p1/2(6,1/2)o                                      5000.  0.784E-01  0.215    
         λ=2369.9 A                                               10000.  0.554E-01  0.431    
                                                                  20000.  0.392E-01  0.861    
                                                                  40000.  0.277E-01   1.72    
                                                                  80000.  0.196E-01   3.45   
                                                                  
  Tb III 5d8G - 6p3/2(6,3/2)o                                      5000.  0.707E-01  0.177    
         λ=2107.6 A                                               10000.  0.500E-01  0.354    
                                                                  20000.  0.354E-01  0.708    
                                                                  40000.  0.250E-01   1.42    
                                                                  80000.  0.177E-01   2.83  
                                                                  
  Tb III 5d8D - 6p1/2(6,1/2)o                                      5000.  0.881E-01  0.215    
         λ=2498.1 A                                               10000.  0.623E-01  0.431    
                                                                  20000.  0.441E-01  0.861    
                                                                  40000.  0.312E-01   1.72    
                                                                  80000.  0.220E-01   3.45    
                                                                  
  Tb III 5d8D - 6p3/2(6,3/2)o                                      5000.  0.785E-01  0.177    
         λ=2208.4 A                                               10000.  0.555E-01  0.354    
                                                                  20000.  0.392E-01  0.708    
                                                                  40000.  0.277E-01   1.42    
                                                                  80000.  0.196E-01   2.83  
                                                                  
  Tb III 5d8F - 6p1/2(6,1/2)o                                      5000.  0.102      0.215    
         λ=2668.7 A                                               10000.  0.722E-01  0.431    
                                                                  20000.  0.510E-01  0.861    
                                                                  40000.  0.361E-01   1.72    
                                                                  80000.  0.255E-01   3.45 
                                                                  
  Tb III 5d8F - 6p3/2(6,3/2)o                                      5000.  0.893E-01  0.177    
         λ=2340.7 A                                               10000.  0.631E-01  0.354    
                                                                  20000.  0.446E-01  0.708    
                                                                  40000.  0.316E-01   1.42    
                                                                  80000.  0.223E-01   2.83  
                                                                  
  Tb III 5d8H - 6p1/2(6,1/2)o                                      5000.  0.112      0.215    
         λ=2783.6 A                                               10000.  0.792E-01  0.431    
                                                                  20000.  0.560E-01  0.861    
                                                                  40000.  0.396E-01   1.72    
                                                                  80000.  0.280E-01   3.45   
                                                                  
  Tb III 5d8F - 6p3/2(6,3/2)o                                      5000.  0.969E-01  0.177    
         λ=2428.6 A                                               10000.  0.685E-01  0.354    
                                                                  20000.  0.484E-01  0.708    
                                                                  40000.  0.342E-01   1.42    
                                                                  80000.  0.242E-01   2.83   
                                                                  
  Tb III 5d6F11/2 - 6p1/2(6,1/2)o                                  5000.  0.121      0.215    
         λ=2880.5 A                                               10000.  0.855E-01  0.431    
                                                                  20000.  0.604E-01  0.861    
                                                                  40000.  0.427E-01   1.72    
                                                                  80000.  0.302E-01   3.45  
  
  Tb III 5d6F11/2 - 6p3/2(6,3/2)o                                  5000.  0.103      0.177    
         λ=2502.0 A                                               10000.  0.732E-01  0.354    
                                                                  20000.  0.517E-01  0.708    
                                                                  40000.  0.366E-01   1.42    
                                                                  80000.  0.259E-01   2.83 
   
  Tb III 5d6F9/2 - 6p1/2(6,1/2)o                                   5000.  0.132      0.215    
         λ=2996.0 A                                               10000.  0.932E-01  0.431    
                                                                  20000.  0.659E-01  0.861    
                                                                  40000.  0.466E-01   1.72    
                                                                  80000.  0.330E-01   3.45 
   
  Tb III 5d6F9/2 - 6p3/2(6,3/2)o                                   5000.  0.112      0.177    
         λ=2588.7 A                                               10000.  0.789E-01  0.354    
                                                                  20000.  0.558E-01  0.708    
                                                                  40000.  0.395E-01   1.42    
                                                                  80000.  0.279E-01   2.83  
  
  Tb III 5d6F7/2 - 6p1/2(6,1/2)o                                   5000.  0.143      0.215    
         λ=3111.3 A                                               10000.  0.101      0.431    
                                                                  20000.  0.717E-01  0.861    
                                                                  40000.  0.507E-01   1.72    
                                                                  80000.  0.358E-01   3.45  
  
  Tb III 5d6F7/2 - 6p3/2(6,3/2)o                                   5000.  0.120      0.177    
         λ=2674.3 A                                               10000.  0.848E-01  0.354    
                                                                  20000.  0.600E-01  0.708    
                                                                  40000.  0.424E-01   1.42    
                                                                  80000.  0.300E-01   2.83  
   
  Tb III 5d6F5/2 - 6p1/2(6,1/2)o                                   5000.  0.153      0.215    
         λ=3206.6 A                                               10000.  0.108      0.431    
                                                                  20000.  0.766E-01  0.861    
                                                                  40000.  0.542E-01   1.72    
                                                                  80000.  0.383E-01   3.45 
   
  Tb III 5d6F5/2 - 6p3/2(6,3/2)o                                   5000.  0.127      0.177    
         λ=2744.5 A                                               10000.  0.898E-01  0.354    
                                                                  20000.  0.635E-01  0.708    
                                                                  40000.  0.449E-01   1.42    
                                                                  80000.  0.318E-01   2.83  
  
  Tb III 5d6F3/2 - 6p1/2(6,1/2)o                                   5000.  0.161      0.215    
        λ=3277.2 A                                                10000.  0.114      0.431    
                                                                  20000.  0.804E-01  0.861    
                                                                  40000.  0.568E-01   1.72    
                                                                  80000.  0.402E-01   3.45  
  
  Tb III 5d6F3/2 - 6p3/2(6,3/2)o                                   5000.  0.132      0.177    
         λ=2792.5 A                                               10000.  0.935E-01  0.353    
                                                                  20000.  0.661E-01  0.707    
                                                                  40000.  0.467E-01   1.41    
                                                                  80000.  0.330E-01   2.83 
   
  Tb III 5d6G13/2 - 6p1/2(6,1/2)o                                  5000.  0.127      0.215    
         λ=2941.6                                                 10000.  0.895E-01  0.431    
                                                                  20000.  0.633E-01  0.861    
                                                                  40000.  0.448E-01   1.72    
                                                                  80000.  0.317E-01   3.45   
 
  Tb III 5d6G13/2 - 6p3/2(6,3/2)o                                  5000.  0.108      0.177    
         λ=2545.1 A                                               10000.  0.761E-01  0.353    
                                                                  20000.  0.538E-01  0.707    
                                                                  40000.  0.380E-01   1.41    
                                                                  80000.  0.269E-01   2.83  
  
  Tb III 5d6G11/2 - 6p1/2(6,1/2)o                                  5000.  0.142      0.215    
         λ=3100.6 A                                               10000.  0.101      0.431    
                                                                  20000.  0.711E-01  0.861    
                                                                  40000.  0.503E-01   1.72    
                                                                  80000.  0.356E-01   3.45  
  
  Tb III 5d6G11/2 6p3/2(6,3/2)o                                    5000.  0.119      0.177    
         λ=2666.4 A                                               10000.  0.843E-01  0.354    
                                                                  20000.  0.596E-01  0.708    
                                                                  40000.  0.421E-01   1.42    
                                                                  80000.  0.298E-01   2.83  
  
  Tb III 5d6G9/2 - 6p1/2(6,1/2)o                                   5000.  0.155      0.215    
         λ=3224.6 A                                               10000.  0.110      0.431    
                                                                  20000.  0.776E-01  0.861    
                                                                  40000.  0.548E-01   1.72    
                                                                  80000.  0.388E-01   3.45   
 
  Tb III 5d6G9/2 - 6p3/2(6,3/2)o                                   5000.  0.128      0.177    
         λ=2757.6 A                                               10000.  0.908E-01  0.354    
                                                                  20000.  0.642E-01  0.708    
                                                                  40000.  0.454E-01   1.42    
                                                                  80000.  0.321E-01   2.83    

  Tb III 5d6G7/2 - 6p1/2(6,1/2)o                                   5000.  0.166      0.215    
         λ=3323.7 A                                               10000.  0.117      0.431    
                                                                  20000.  0.829E-01  0.861    
                                                                  40000.  0.586E-01   1.72    
                                                                  80000.  0.415E-01   3.45   
 
  Tb III 5d6G7/2 - 6p3/2(6,3/2)o                                   5000.  0.136      0.177    
         λ=2829.8 A                                               10000.  0.961E-01  0.354    
                                                                  20000.  0.680E-01  0.708    
                                                                  40000.  0.481E-01   1.42    
                                                                  80000.  0.340E-01   2.83 
   
  Tb III 5d6G5/2 - 6p1/2(6,1/2)o                                   5000.  0.175      0.215    
         λ=3403.7 A                                               10000.  0.124      0.431    
                                                                  20000.  0.874E-01  0.861    
                                                                  40000.  0.618E-01   1.72    
                                                                  80000.  0.437E-01   3.45   
 
  Tb III 5d6G5/2 - 6p3/2(6,3/2)o                                   5000.  0.142      0.178    
         λ=2887.6 A                                               10000.  0.100      0.356    
                                                                  20000.  0.711E-01  0.713    
                                                                  40000.  0.502E-01   1.43    
                                                                  80000.  0.355E-01   2.85   
 
  Tb III 5d6G3/2 - 6p1/2(6,1/2)o                                   5000.  0.181      0.215    
         λ=3457.9 A                                               10000.  0.128      0.431    
                                                                  20000.  0.905E-01  0.861    
                                                                  40000.  0.640E-01   1.72    
                                                                  80000.  0.452E-01   3.45   
 
  Tb III 5d6G3/2 - 6p3/2(6,3/2)o                                   5000.  0.146      0.181    
         λ=2926.5 A                                               10000.  0.104      0.362    
                                                                  20000.  0.732E-01  0.724    
                                                                  40000.  0.518E-01   1.45    
                                                                  80000.  0.366E-01   2.90    

  Tb III 5d8P9/2 - 6p1/2(6,1/2)o                                   5000.  0.132      0.215    
         λ=2994.7 A                                               10000.  0.931E-01  0.431    
                                                                  20000.  0.659E-01  0.861    
                                                                  40000.  0.466E-01   1.72    
                                                                  80000.  0.366E-01   2.90    

  TbIII 5d8P9/2 - 6p1/2(6,1/2)o                                    5000.  0.132      0.215    
         λ=2994.7 A                                               10000.  0.931E-01  0.431    
                                                                  20000.  0.659E-01  0.861    
                                                                  40000.  0.466E-01   1.72    
                                                                  80000.  0.329E-01   3.45  

  TbIII 5d8P9/2 - 6p3/2(6,3/2)o                                    5000.  0.112      0.177    
         λ=2587.8 A                                               10000.  0.788E-01  0.354    
                                                                  20000.  0.558E-01  0.708    
                                                                  40000.  0.394E-01   1.42    
                                                                  80000.  0.279E-01   2.83    
                                                                  
  TbIII 5d8P7/2 - 6p1/2(6,1/2)o                                    5000.  0.157      0.215    
         λ=3240.6 A                                               10000.  0.111      0.431    
                                                                  20000.  0.784E-01  0.861    
                                                                  40000.  0.554E-01   1.72    
                                                                  80000.  0.392E-01   3.45    
                                                                  
  TbIII 5d8P7/2 - 6p3/2(6,3/2)o                                    5000.  0.130      0.177    
         λ=2769.4 A                                               10000.  0.916E-01  0.354    
                                                                  20000.  0.648E-01  0.708    
                                                                  40000.  0.458E-01   1.42    
                                                                  80000.  0.324E-01   2.83    
                                                                  
  TbIII 5d8P5/2 - 6p1/2(6,1/2)o                                    5000.  0.177      0.215    
         λ=3427.8 A                                               10000.  0.125      0.431    
                                                                  20000.  0.887E-01  0.861    
                                                                  40000.  0.627E-01   1.72    
                                                                  80000.  0.444E-01   3.45  
                                                                  
  TbIII 5d8P5/2 - 6p3/2(6,3/2)o                                    5000.  0.144      0.179    
         λ=2904.9 A                                               10000.  0.102      0.359    
                                                                  20000.  0.720E-01  0.718    
                                                                  40000.  0.509E-01   1.44    
                                                                  80000.  0.360E-01   2.87

  Tb III 5d6H15/2 - 6p1/2(6,1/2)o                                  5000.  0.132      0.215    
         λ=2997.8 A                                               10000.  0.934E-01  0.431    
                                                                  20000.  0.660E-01  0.861    
                                                                  40000.  0.467E-01   1.72    
                                                                  80000.  0.330E-01   3.45    

  Tb III 5d6H15/2 - 6p3/2(6,3/2)o                                  5000.  0.112      0.177    
         λ=2590.1 A                                               10000.  0.790E-01  0.354    
                                                                  20000.  0.559E-01  0.708    
                                                                  40000.  0.395E-01   1.42    
                                                                  80000.  0.279E-01   2.83  
  
  Tb III 5d6H13/2 - 6p1/2(6,1/2)o                                  5000.  0.153      0.215    
         λ=3203.7 A                                               10000.  0.108      0.431    
                                                                  20000.  0.765E-01  0.861    
                                                                  40000.  0.541E-01   1.72    
                                                                  80000.  0.382E-01   3.45   
 
  Tb III 5d6H13/2 - 6p3/2(6,3/2)o                                  5000.  0.127      0.177    
         λ=2742.4 A                                               10000.  0.897E-01  0.354    
                                                                  20000.  0.634E-01  0.708    
                                                                  40000.  0.448E-01   1.42    
                                                                  80000.  0.317E-01   2.83    

  Tb III 5d6H11/2 - 6p1/2(6,1/2)o                                  5000.  0.168      0.215    
         λ=3340.3 A                                               10000.  0.119      0.431    
                                                                  20000.  0.838E-01  0.861    
                                                                  40000.  0.593E-01   1.72    
                                                                  80000.  0.419E-01   3.45  
  
  Tb III 5d6H11/2 - 6p3/2(6,3/2)o                                  5000.  0.137      0.177    
         λ=2841.8 A                                               10000.  0.970E-01  0.354    
                                                                  20000.  0.686E-01  0.708    
                                                                  40000.  0.485E-01   1.42    
                                                                  80000.  0.343E-01   2.83   
 
  Tb III 5d6H9/2 - 6p1/2(6,1/2)o                                   5000.  0.181      0.215    
         λ=3458.5 A                                               10000.  0.128      0.431    
                                                                  20000.  0.905E-01  0.861    
                                                                  40000.  0.640E-01   1.72    
                                                                  80000.  0.452E-01   3.45 
   
  Tb III 5d6H9/2 - 6p3/2(6,3/2)o                                   5000.  0.146      0.181    
         λ=2926.9 A                                               10000.  0.104      0.362    
                                                                  20000.  0.732E-01  0.724    
                                                                  40000.  0.518E-01   1.45    
                                                                  80000.  0.366E-01   2.90   
 
  Tb III 5d6H7/2 - 6p1/2(6,1/2)o                                   5000.  0.192      0.215    
         λ=3553.3 A                                               10000.  0.136      0.431    
                                                                  20000.  0.960E-01  0.861    
                                                                  40000.  0.679E-01   1.72    
                                                                  80000.  0.480E-01   3.45   
 
  Tb III 5d6H7/2 - 6p3/2(6,3/2)o                                   5000.  0.154      0.186    
         λ=2994.5 A                                               10000.  0.109      0.372    
                                                                  20000.  0.770E-01  0.744    
                                                                  40000.  0.545E-01   1.49    
                                                                  80000.  0.385E-01   2.98  
  
  Tb III 5d6H5/2 - 6p1/2(6,1/2)o                                   5000.  0.201      0.215    
         λ=3628.2 A                                               10000.  0.142      0.431    
                                                                  20000.  0.101      0.861    
                                                                  40000.  0.711E-01   1.72    
                                                                  80000.  0.503E-01   3.45  
  
  Tb III 5d6H5/2 - 6p3/2(6,3/2)o                                   5000.  0.160      0.190    
         λ=3047.6 A                                               10000.  0.113      0.380    
                                                                  20000.  0.801E-01  0.760    
                                                                  40000.  0.566E-01   1.52    
                                                                  80000.  0.400E-01   3.04    

  Tb III 5d6D9/2 - 6p1/2(6,1/2)o                                   5000.  0.166      0.215    
         λ=3329.1 A                                               10000.  0.118      0.431    
                                                                  20000.  0.832E-01  0.861    
                                                                  40000.  0.588E-01   1.72    
                                                                  80000.  0.416E-01   3.45 
   
  Tb III 5d6D9/2 - 6p3/2(6,3/2)o                                   5000.  0.136      0.177    
         λ=2833.7 A                                               10000.  0.964E-01  0.354    
                                                                  20000.  0.682E-01  0.708    
                                                                  40000.  0.482E-01   1.42    
                                                                  80000.  0.341E-01   2.83    

  Tb III 5d6D7/2 - 6p1/2(6,1/2)o                                   5000.  0.177      0.215    
         λ=3419.9 A                                               10000.  0.125      0.431    
                                                                  20000.  0.883E-01  0.861    
                                                                  40000.  0.624E-01   1.72    
                                                                  80000.  0.441E-01   3.45 
   
  Tb III 5d6D7/2 - 6p3/2(6,3/2)o                                   5000.  0.143      0.179    
         λ=2899.2 A                                               10000.  0.101      0.358    
                                                                  20000.  0.717E-01  0.716    
                                                                  40000.  0.507E-01   1.43    
                                                                  80000.  0.358E-01   2.86  
 
  Tb III 5d6D5/2 - 6p1/2(6,1/2)o                                   5000.  0.195      0.215    
         λ=3576.0 A                                               10000.  0.138      0.431    
                                                                  20000.  0.974E-01  0.861    
                                                                  40000.  0.689E-01   1.72    
                                                                  80000.  0.487E-01   3.45   
 
  Tb III 5d6D5/2 - 6p3/2(6,3/2)o                                   5000.  0.156      0.187    
         λ=3010.7 A                                               10000.  0.110      0.374    
                                                                  20000.  0.779E-01  0.749    
                                                                  40000.  0.551E-01   1.50    
                                                                  80000.  0.390E-01   3.00  
  
  Tb III 5d6D3/2 - 6p1/2(6,1/2)o                                   5000.  0.207      0.215    
         λ=3672.4 A                                               10000.  0.146      0.431    
                                                                  20000.  0.103      0.861    
                                                                  40000.  0.730E-01   1.72    
                                                                  80000.  0.516E-01   3.45  
 
  Tb III 5d6D3/2 - 6p3/2(6,3/2)o                                   5000.  0.164      0.192    
         λ=3078.7 A                                               10000.  0.116      0.385    
                                                                  20000.  0.819E-01  0.769    
                                                                  40000.  0.579E-01   1.54    
                                                                  80000.  0.409E-01   3.08  
 
  Tb III 5d6P7/2 - 6p1/2(6,1/2)o                                   5000.  0.207      0.215    
         λ=3680.2 A                                               10000.  0.147      0.431    
                                                                  20000.  0.104      0.861    
                                                                  40000.  0.734E-01   1.72    
                                                                  80000.  0.519E-01   3.45  
  
  Tb III 5d6P7/2 - 6p3/2(6,3/2)o                                   5000.  0.164      0.193    
         λ=3084.2 A                                               10000.  0.116      0.385    
                                                                  20000.  0.822E-01  0.771    
                                                                  40000.  0.581E-01   1.54    
                                                                  80000.  0.411E-01   3.08 
   
  Tb III 5d6P5/2 - 6p1/2(6,1/2)o                                   5000.  0.238      0.215    
         λ=3918.3 A                                               10000.  0.168      0.431    
                                                                  20000.  0.119      0.861    
                                                                  40000.  0.842E-01   1.72    
                                                                  80000.  0.595E-01   3.45  
  
  Tb III 5d6P5/2 - 6p3/2(6,3/2)o                                   5000.  0.184      0.205    
         λ=3249.6 A                                               10000.  0.130      0.410    
                                                                  20000.  0.922E-01  0.821    
                                                                  40000.  0.652E-01   1.64    
                                                                  80000.  0.461E-01   3.28   
 
  Tb III 5d6P3/2 - 6p1/2(6,1/2)o                                   5000.  0.267      0.216    
         λ=4130.8 A                                               10000.  0.189      0.433    
                                                                  20000.  0.134      0.866    
                                                                  40000.  0.945E-01   1.73    
                                                                  80000.  0.668E-01   3.46 
   
  Tb III 5d6P3/2 - 6p3/2(6,3/2)o                                   5000.  0.203      0.216    
         λ=3394.5 A                                               10000.  0.144      0.433    
                                                                  20000.  0.102      0.866    
                                                                  40000.  0.718E-01   1.73    
                                                                  80000.  0.508E-01   3.46    

  Tb III 6s8F13/2 - 6p1/2(6,1/2)o                                  5000.  0.254      0.215
        λ=2900.4 A                                                10000.  0.180      0.431
                                                                  20000.  0.127      0.861
                                                                  40000.  0.899E-01   1.72    
                                                                  80000.  0.636E-01   3.45    

  Tb III 6s8F13/2 - 6p3/2(6,3/2)o                                  5000.  0.204      0.177    
        λ=2517.1 A                                                10000.  0.144      0.354    
                                                                  20000.  0.102      0.708    
                                                                  40000.  0.721E-01   1.42    
                                                                  80000.  0.510E-01   2.83    

  Tb III 6s8F11/2 - 6p1/2(6,1/2)o                                  5000.  0.281      0.215    
        λ=3032.8 A                                                10000.  0.198      0.431    
                                                                  20000.  0.140      0.861    
                                                                  40000.  0.992E-01   1.72    
                                                                  80000.  0.702E-01   3.45    

  Tb III 6s8F11/2 - 6p3/2(6,3/2)o                                  5000.  0.222      0.177    
        λ=2616.1 A                                                10000.  0.157      0.354    
                                                                  20000.  0.111      0.708    
                                                                  40000.  0.786E-01   1.42    
                                                                  80000.  0.556E-01   2.83    

  Tb III 6s8F9/2 - 6p1/2(6,1/2)o                                   5000.  0.310      0.215    
        λ=3174.1 A                                                10000.  0.219      0.431    
                                                                  20000.  0.155      0.861    
                                                                  40000.  0.110       1.72    
                                                                  80000.  0.776E-01   3.45    

  Tb III 6s8F9/2 - 6p3/2(6,3/2)o                                   5000.  0.243      0.177    
        λ=2720.6 A                                                10000.  0.171      0.354    
                                                                  20000.  0.121      0.708    
                                                                  40000.  0.857E-01   1.42    
                                                                  80000.  0.606E-01   2.83    

  Tb III 6s8F7/2 - 6p1/2(6,1/2)o                                   5000.  0.333      0.215    
        λ=3277.4 A                                                10000.  0.235      0.431    
                                                                  20000.  0.167      0.861    
                                                                  40000.  0.118       1.72    
                                                                  80000.  0.833E-01   3.45    

  Tb III 6s8F7/2 - 6p3/2(6,3/2)o                                   5000.  0.258      0.177    
        λ=2796.2 A                                                10000.  0.182      0.354    
                                                                  20000.  0.129      0.708    
                                                                  40000.  0.911E-01   1.42    
                                                                  80000.  0.644E-01   2.83    

  Tb III 6s8F5/2 - 6p1/2(6,1/2)o                                   5000.  0.352      0.215    
        λ=3359.2 A                                                10000.  0.249      0.431    
                                                                  20000.  0.176      0.861    
                                                                  40000.  0.124       1.72    
                                                                  80000.  0.879E-01   3.45    

  Tb III 6s8F5/2 - 6p3/2(6,3/2)o                                   5000.  0.270      0.177    
        λ=2855.5 A                                                10000.  0.191      0.354    
                                                                  20000.  0.135      0.708    
                                                                  40000.  0.955E-01   1.42    
                                                                  80000.  0.675E-01   2.83    

  Tb III 6s8F3/2 - 6p1/2(6,1/2)o                                   5000.  0.365      0.215    
        λ=3418.1 A                                                10000.  0.258      0.431    
                                                                  20000.  0.183      0.861    
                                                                  40000.  0.129       1.72    
                                                                  80000.  0.913E-01   3.45    

  Tb III 6s8F3/2 - 6p3/2(6,3/2)o                                   5000.  0.279      0.179    
       λ= 2898.0 A                                                10000.  0.197      0.358    
                                                                  20000.  0.140      0.716    
                                                                  40000.  0.987E-01   1.43    
                                                                  80000.  0.698E-01   2.86    

  Tb III 6s8F1/2 - 6p1/2(6,1/2)o                                   5000.  0.374      0.215    
        λ=3454.2 A                                                10000.  0.264      0.431    
                                                                  20000.  0.187      0.861    
                                                                  40000.  0.132       1.72    
                                                                  80000.  0.934E-01   3.45    

  Tb III 6s8F1/2 - 6p3/2(6,3/2)o                                   5000.  0.285      0.181    
        λ=2923.8 A                                                10000.  0.201      0.362    
                                                                  20000.  0.142      0.723    
                                                                  40000.  0.101       1.45    
                                                                  80000.  0.711E-01   2.89    

  Tb III 6s6F11/2 - 6p1/2(6,1/2)o                                  5000.  0.303      0.215    
        λ=3141.0 A                                                10000.  0.214      0.431    
                                                                  20000.  0.152      0.861    
                                                                  40000.  0.107       1.72    
                                                                  80000.  0.758E-01   3.45    

  Tb III 6s6F11/2 - 6p3/2(6,3/2)o                                  5000.  0.238      0.177    
       λ=2696.3 A                                                 10000.  0.168      0.354    
                                                                  20000.  0.119      0.708    
                                                                  40000.  0.840E-01   1.42    
                                                                  80000.  0.594E-01   2.83    

  Tb III 6s6F9/2 - 6p1/2(6,1/2)o                                   5000.  0.354      0.215    
        λ=3369.4 A                                                10000.  0.250      0.431    
                                                                  20000.  0.177      0.861    
                                                                  40000.  0.125       1.72    
                                                                  80000.  0.885E-01   3.45    
             
  Tb III 6s6F9/2 - 6p3/2(6,3/2)o                                   5000.  0.272      0.177    
        λ=2862.9 A                                                10000.  0.192      0.354    
                                                                  20000.  0.136      0.708    
                                                                  40000.  0.960E-01   1.42    
                                                                  80000.  0.679E-01   2.83    

  Tb III 6s6F7/2 - 6p1/2(6,1/2)o                                   5000.  0.378      0.215    
        λ=3472.6 A                                                10000.  0.267      0.431    
                                                                  20000.  0.189      0.861    
                                                                  40000.  0.134       1.72    
                                                                  80000.  0.945E-01   3.45    

  Tb III 6s6F7/2 - 6p3/2(6,3/2)o                                   5000.  0.287      0.182    
        λ=2937.1 A                                                10000.  0.203      0.364    
                                                                  20000.  0.144      0.727    
                                                                  40000.  0.102       1.45    
                                                                  80000.  0.719E-01   2.91    

  Tb III 6s6F5/2 - 6p1/2(6,1/2)o                                   5000.  0.407      0.215    
        λ=3591.1 A                                                10000.  0.288      0.431    
                                                                  20000.  0.204      0.861    
                                                                  40000.  0.144       1.72    
                                                                  80000.  0.102       3.45    

  Tb III 6s6F5/2 - 6p3/2(6,3/2)o                                   5000.  0.306      0.188    
        λ=3021.3 A                                                10000.  0.216      0.376    
                                                                  20000.  0.153      0.752    
                                                                  40000.  0.108       1.50    
                                                                  80000.  0.765E-01   3.01    

  Tb III 6s6F3/2 - 6p1/2(6,1/2)o                                   5000.  0.425      0.215    
       λ=3664.1 A                                                 10000.  0.301      0.431    
                                                                  20000.  0.213      0.861    
                                                                  40000.  0.150       1.72    
                                                                  80000.  0.106       3.45    
 
  Tb III 6s6F3/2 - 6p3/2(6,3/2)o                                   5000.  0.318      0.192    
       λ= 3072.9 A                                                10000.  0.225      0.384    
                                                                  20000.  0.159      0.767    
                                                                  40000.  0.112       1.53    
                                                                  80000.  0.794E-01   3.07 
   
  Tb III 6s6F1/2 - 6p1/2(6,1/2)o                                   5000.  0.439      0.215    
        λ=3715.7 A                                                10000.  0.310      0.431    
                                                                  20000.  0.219      0.861    
                                                                  40000.  0.155       1.72    
                                                                  80000.  0.110       3.45    

  Tb III 6s6F1/2 - 6p3/2(6,3/2)o                                   5000.  0.326      0.195    
        λ=3109.1 A                                                10000.  0.231      0.389    
                                                                  20000.  0.163      0.778    
                                                                  40000.  0.115       1.56    
--------------------------------------------------------------------------------------------
  Tb IV  4f7(8So)5d9Do - 4f7(8So7/2)6p1/2(7/2,1/2)3                5000.  0.275E-01  0.122    
         λ=1338.7 A                                               10000.  0.195E-01  0.243    
                                                                  20000.  0.138E-01  0.486    
                                                                  40000.  0.974E-02  0.973    
                                                                  80000.  0.689E-02   1.95  
  
 Tb IV 4f7(8So)5d9Do - 4f7(8So7/2)6p1/2(7/2,1/2)4                  5000.  0.273E-01  0.119    
         λ=1324.5 A                                               10000.  0.193E-01  0.239    
                                                                  20000.  0.136E-01  0.477    
                                                                  40000.  0.964E-02  0.955    
                                                                  80000.  0.682E-02   1.91    

 Tb IV 4f7(8So)5d9Do - 4f7(8So7/2)6p3/2(7/2,3/2)5                  5000.  0.255E-01  0.106    
         λ=1232.3 A                                               10000.  0.180E-01  0.211    
                                                                  20000.  0.128E-01  0.423    
                                                                  40000.  0.902E-02  0.845    
                                                                  80000.  0.638E-02   1.69    

 Tb IV 4f7(8So)6s9So - 4f7(8So7/2)6p1/2(7/2,1/2)3                  5000.  0.161      0.122    
         λ=2331.8 A                                               10000.  0.114      0.243    
                                                                  20000.  0.807E-01  0.486    
                                                                  40000.  0.570E-01  0.973    
                                                                  80000.  0.403E-01   1.95    

  Tb IV 4f7(8So)6s9So - 4f7(8So7/2)6p1/2(7/2,1/2)4                 5000.  0.156      0.122    
         λ=2289.3 A                                               10000.  0.111      0.243    
                                                                  20000.  0.782E-01  0.486    
                                                                  40000.  0.553E-01  0.973    
                                                                  80000.  0.391E-01   1.95    

  Tb IV 4f7(8So)6s9So - 4f7(8So7/2)6p3/2(7/2,3/2)5                 5000.  0.128       0.122    
         λ=2027.1 A                                               10000.  0.904E-01   0.243    
                                                                  20000.  0.639E-01   0.486    
                                                                  40000.  0.452E-01   0.973    
                                                                  80000.  0.319E-01    1.95    

  Tb IV 4f7(8So)5d7Do - 4f7(8So7/2)6p3/2(7/2,3/2)                  5000.  0.250E-01   0.107    
         λ=1203.8 A                                               10000.  0.177E-01   0.214    
                                                                  20000.  0.125E-01   0.429    
                                                                  40000.  0.884E-02   0.858    
                                                                  80000.  0.625E-02    1.72    

  Tb IV 4f7(8So)6s7So - 4f7(8So7/2)6p3/2(7/2,3/2)                  5000.  0.135       0.107    
         λ=2056.2 A                                               10000.  0.953E-01   0.214    
                                                                  20000.  0.674E-01   0.429    
                                                                  40000.  0.477E-01   0.858    
                                                                  80000.  0.337E-01    1.72  
_____________________________________________________________________________________________
